# Supplementary material
Source: MDPI journal article supplement (https://www.mdpi.com/2071-1050/13/15/8567)
Supplement: s1 [file s1]

# Stable isotopic evidence for nutrient rejuvenation and long-term resilience on Tikopia Island (Southeast Solomon Islands)

Jillian A. Swift <sup>1</sup>, Patrick V. Kirch <sup>2</sup> Jana Ilgner<sup>3</sup>, Samantha Brown<sup>4</sup>, Mary Lucas<sup>3</sup>, Sara Marzo<sup>3</sup>, and Patrick Roberts<sup>3</sup>

## Supplementary Information

**Table S1.** Results of stable carbon and nitrogen isotope analysis of commensal bone collagen and quality control indicators, including previously published samples.

| Sample  | $\delta^{13}\text{C}$ | $\delta^{15}\text{N}$ | %N   | %C   | C:N | Phase     |
|---------|-----------------------|-----------------------|------|------|-----|-----------|
| TKR-3*  | -15.3                 | 15.9                  | 12.6 | 35.8 | 3.3 | Kiki      |
| TKR-7*  | -19.9                 | 11.9                  | 13.9 | 41.0 | 3.4 | Kiki      |
| TKR-9*  | -18.8                 | 12.6                  | 14.1 | 40.8 | 3.4 | Kiki      |
| TKR-10* | -15.3                 | 12.3                  | 13.2 | 39.2 | 3.5 | Kiki      |
| TKR-11* | -14.8                 | 12.0                  | 8.2  | 23.2 | 3.3 | Kiki      |
| TKR-12* | -17.1                 | 13.4                  | 6.0  | 18.1 | 3.5 | Kiki      |
| TKR-14* | -17.2                 | 13.2                  | 15.4 | 43.5 | 3.3 | Kiki      |
| TKR-15* | -14.1                 | 15.1                  | 12.7 | 38.1 | 3.5 | Kiki      |
| TKR-18* | -18.9                 | 14.3                  | 9.2  | 27.6 | 3.5 | Kiki      |
| TKR-19* | -17.4                 | 16.1                  | 13.4 | 39.4 | 3.4 | Kiki      |
| TKR-20* | -20.2                 | 12.8                  | 10.8 | 32.6 | 3.5 | Kiki      |
| TKR-23* | -15.7                 | 12.5                  | 12.8 | 37.4 | 3.4 | Kiki      |
| TKR-26* | -19.4                 | 12.4                  | 15.0 | 44.9 | 3.5 | Kiki      |
| TKR-87* | -15.0                 | 13.3                  | 7.2  | 21.1 | 3.4 | Kiki      |
| TKR-55* | -20.4                 | 11.7                  | 11.1 | 33.4 | 3.5 | Kiki      |
| TKR-56* | -18.9                 | 13.9                  | 14.2 | 41.4 | 3.4 | Kiki      |
| TKR-58* | -18.5                 | 12.9                  | 10.4 | 31.5 | 3.5 | Kiki      |
| TKR-59* | -16.3                 | 13.1                  | 9.8  | 30.0 | 3.6 | Kiki      |
| TKR-60* | -17.0                 | 13.0                  | 13.2 | 40.7 | 3.6 | Kiki      |
| TKR-61* | -17.9                 | 11.7                  | 15.0 | 43.9 | 3.4 | Kiki      |
| TKR-62* | -18.9                 | 11.3                  | 15.0 | 45.3 | 3.5 | Kiki      |
| TKR-63* | -15.9                 | 13.0                  | 10.4 | 31.9 | 3.6 | Kiki      |
| TKR-68* | -17.7                 | 15.0                  | 9.7  | 29.0 | 3.5 | Kiki      |
| TKR-36* | -20.2                 | 10.9                  | 14.8 | 43.8 | 3.5 | Sinapupu  |
| TKR-38* | -18.6                 | 8.1                   | 10.4 | 29.9 | 3.4 | Sinapupu  |
| TKR-40* | -19.3                 | 9.2                   | 7.3  | 21.8 | 3.5 | Sinapupu  |
| TKR-41* | -19.3                 | 9.8                   | 7.7  | 23.8 | 3.6 | Sinapupu  |
| TKR-53* | -23.0                 | 8.7                   | 15.4 | 43.5 | 3.3 | Tuakamali |

|         |       |      |      |      |     |           |
|---------|-------|------|------|------|-----|-----------|
| TKS1    | -20.5 | 8.8  | 16.7 | 48.4 | 3.4 | Tuakamali |
| TKS2    | -20.3 | 10.2 | 13.4 | 38.0 | 3.3 | Tuakamali |
| TKS3    | -20.4 | 9.0  | 16.5 | 48.2 | 3.4 | Kiki      |
| TKS4    | -20.1 | 9.0  | 17.3 | 49.6 | 3.3 | Tuakamali |
| TKS10   | -20.6 | 10.6 | 17.7 | 49.9 | 3.3 | Tuakamali |
| TKS11   | -21.0 | 6.3  | 14.3 | 40.6 | 3.3 | Sinapupu  |
| TKS13   | -20.9 | 9.4  | 14.3 | 42.5 | 3.5 | Tuakamali |
| TKS15   | -20.5 | 8.2  | 13.8 | 39.1 | 3.3 | Tuakamali |
| TKS16   | -19.3 | 8.6  | 13.0 | 37.5 | 3.4 | Tuakamali |
| TKS17   | -20.2 | 10.4 | 15.8 | 44.7 | 3.3 | Tuakamali |
| TKS18   | -20.4 | 12.6 | 17.5 | 49.6 | 3.3 | Tuakamali |
| TKS19   | -20.1 | 11.8 | 16.9 | 47.9 | 3.3 | Tuakamali |
| TKS20   | -18.3 | 11.6 | 17.0 | 48.7 | 3.3 | Kiki      |
| TKS21   | -21.7 | 12.0 | 15.8 | 46.3 | 3.4 | Tuakamali |
| TKS22   | -20.2 | 9.8  | 16.5 | 47.7 | 3.4 | Tuakamali |
| TKS23   | -21.4 | 10.7 | 13.8 | 38.8 | 3.3 | Tuakamali |
| TKS24   | -20.9 | 10.8 | 14.0 | 38.8 | 3.2 | Tuakamali |
| TKS25   | -20.8 | 8.5  | 12.0 | 33.0 | 3.2 | Tuakamali |
| TKS26   | -20.3 | 8.9  | 16.8 | 46.8 | 3.3 | Tuakamali |
| TKS27   | -20.5 | 9.0  | 14.9 | 41.0 | 3.2 | Tuakamali |
| TKS28A  | -21.4 | 6.2  | 16.0 | 44.9 | 3.3 | Tuakamali |
| TKS28B  | -20.0 | 9.9  | 16.2 | 46.3 | 3.3 | Tuakamali |
| TKS29   | -19.6 | 10.1 | 16.7 | 47.0 | 3.3 | Tuakamali |
| TKS30   | -20.0 | 10.1 | 14.5 | 39.2 | 3.2 | Tuakamali |
| TKS31   | -20.4 | 9.5  | 16.5 | 46.2 | 3.3 | Sinapupu  |
| TKS32   | -21.2 | 8.8  | 15.8 | 45.5 | 3.4 | Sinapupu  |
| TKS33   | -20.6 | 8.4  | 12.1 | 33.6 | 3.2 | Sinapupu  |
| TKS34   | -21.6 | 5.0  | 12.8 | 35.8 | 3.3 | Sinapupu  |
| TKS35   | -20.5 | 10.5 | 12.7 | 35.1 | 3.2 | Sinapupu  |
| TKS36   | -19.3 | 10.7 | 15.0 | 41.3 | 3.2 | Sinapupu  |
| TKS37   | -20.3 | 6.5  | 15.8 | 44.9 | 3.3 | Sinapupu  |
| TKS39   | -21.4 | 8.4  | 15.8 | 44.8 | 3.3 | Sinapupu  |
| TKS40   | -20.3 | 12.8 | 13.8 | 38.8 | 3.3 | Tuakamali |
| TKS 41  | -16.9 | 13.0 | 15.9 | 46.4 | 3.4 | Tuakamali |
| TKS42   | -19.6 | 9.3  | 16.4 | 46.8 | 3.3 | Tuakamali |
| TKS43   | -19.9 | 11.4 | 14.4 | 41.5 | 3.4 | Tuakamali |
| TKS44   | -19.2 | 9.4  | 11.7 | 33.2 | 3.3 | Tuakamali |
| TKS45   | -19.4 | 10.7 | 15.0 | 43.9 | 3.4 | Tuakamali |
| TKS46** | -19.1 | 10.0 | 11.7 | 33.3 | 3.3 | Tuakamali |
| TKS47** | -19.6 | 6.3  | 13.8 | 39.5 | 3.4 | Tuakamali |

|        |       |      |      |      |     |           |
|--------|-------|------|------|------|-----|-----------|
| TKS48  | -19.3 | 9.8  | 13.0 | 36.5 | 3.3 | Tuakamali |
| TKS49  | -19.3 | 9.5  | 11.3 | 31.7 | 3.3 | Tuakamali |
| TKS50  | -20.2 | 6.4  | 15.7 | 44.9 | 3.3 | Tuakamali |
| TKS51  | -19.7 | 7.6  | 11.2 | 31.5 | 3.3 | Sinapupu  |
| TKS52  | -19.1 | 7.3  | 12.1 | 33.7 | 3.3 | Sinapupu  |
| TKS53  | -19.9 | 8.8  | 14.9 | 41.9 | 3.3 | Tuakamali |
| TKS54  | -19.5 | 11.4 | 14.0 | 39.4 | 3.3 | Tuakamali |
| TKS55  | -19.8 | 8.6  | 12.7 | 34.5 | 3.2 | Tuakamali |
| TKS56  | -20.1 | 9.3  | 15.2 | 42.2 | 3.2 | Tuakamali |
| TKS57  | -19.9 | 10.8 | 16.4 | 46.6 | 3.3 | Tuakamali |
| TKS58  | -19.4 | 9.5  | 13.1 | 35.9 | 3.2 | Tuakamali |
| TKS59  | -19.3 | 9.7  | 13.4 | 36.5 | 3.2 | Tuakamali |
| TKS60  | -19.8 | 9.4  | 15.3 | 42.9 | 3.3 | Tuakamali |
| TKS61  | -20.5 | 8.3  | 16.7 | 47.0 | 3.3 | Tuakamali |
| TKS62  | -19.5 | 8.8  | 14.3 | 41.1 | 3.4 | Tuakamali |
| TKS63  | -20.1 | 9.1  | 14.9 | 41.6 | 3.3 | Sinapupu  |
| TKS64  | -20.3 | 6.4  | 15.3 | 42.3 | 3.2 | Sinapupu  |
| TKS65  | -19.6 | 8.6  | 14.3 | 41.0 | 3.4 | Tuakamali |
| TKS66  | -19.9 | 9.0  | 16.5 | 47.3 | 3.3 | Sinapupu  |
| TKS67  | -20.1 | 9.1  | 12.7 | 36.8 | 3.4 | Sinapupu  |
| TKS68  | -20.6 | 9.7  | 14.7 | 42.5 | 3.4 | Sinapupu  |
| TKS69  | -20.0 | 9.3  | 16.5 | 47.2 | 3.3 | Sinapupu  |
| TKS70  | -20.0 | 6.6  | 14.4 | 40.9 | 3.3 | Sinapupu  |
| TKS71  | -20.8 | 9.3  | 12.5 | 35.7 | 3.3 | Sinapupu  |
| TKS72  | -19.1 | 10.7 | 16.1 | 45.9 | 3.3 | Sinapupu  |
| TKS73  | -19.2 | 8.5  | 13.8 | 40.8 | 3.4 | Sinapupu  |
| TKR-69 | -17.9 | 13.1 | 14.4 | 44.0 | 3.6 | Tuakamali |
| TKR-70 | -18.0 | 12.8 | 14.1 | 43.1 | 3.6 | Tuakamali |
| TKR-71 | -17.0 | 10.7 | 14.5 | 43.3 | 3.5 | Tuakamali |
| TKR-72 | -18.9 | 10.4 | 14.5 | 43.4 | 3.5 | Tuakamali |
| TKR-73 | -19.3 | 9.0  | 13.3 | 39.3 | 3.5 | Sinapupu  |
| TKR-74 | -19.5 | 10.2 | 15.0 | 42.8 | 3.3 | Sinapupu  |
| TKR-76 | -21.0 | 10.5 | 13.7 | 41.2 | 3.5 | Sinapupu  |
| TKR-79 | -20.1 | 7.6  | 14.1 | 40.8 | 3.4 | Sinapupu  |
| TKR-80 | -18.3 | 11.9 | 15.0 | 42.7 | 3.3 | Tuakamali |
| TKR-81 | -20.3 | 9.7  | 14.3 | 43.2 | 3.5 | Tuakamali |
| TKR-82 | -18.9 | 9.0  | 14.2 | 42.5 | 3.5 | Tuakamali |
| TKR-83 | -18.6 | 11.3 | 15.1 | 43.0 | 3.3 | Tuakamali |
| TKR-84 | -21.1 | 15.0 | 14.2 | 43.6 | 3.6 | Tuakamali |
| TKR-86 | -18.1 | 12.8 | 13.6 | 40.7 | 3.5 | Tuakamali |

|        |       |      |      |      |     |           |
|--------|-------|------|------|------|-----|-----------|
| TKR-87 | -17.1 | 11.9 | 13.7 | 41.7 | 3.6 | Tuakamali |
| TKR-88 | -20.2 | 10.8 | 15.0 | 43.3 | 3.4 | Tuakamali |
| TKS-74 | -19.3 | 10.1 | 11.2 | 33.0 | 3.4 | Kiki      |
| TKS-75 | -18.8 | 11.8 | 13.5 | 39.8 | 3.5 | Kiki      |
| TKS-76 | -20.7 | 5.9  | 14.5 | 41.4 | 3.3 | Kiki      |
| TKS-77 | -21.3 | 6.0  | 14.1 | 41.3 | 3.4 | Sinapupu  |
| TKS-78 | -18.6 | 10.0 | 12.2 | 35.4 | 3.4 | Kiki      |
| TKS-79 | -19.0 | 8.3  | 12.6 | 37.8 | 3.5 | Sinapupu  |
| TKS-80 | -20.5 | 8.4  | 13.4 | 38.7 | 3.4 | Sinapupu  |
| TKS-81 | -19.8 | 9.7  | 14.3 | 41.0 | 3.3 | Sinapupu  |
| TKS-82 | -20.2 | 5.9  | 14.4 | 41.2 | 3.3 | Sinapupu  |

\*previously published (Swift et al. 2018)

\*\*collagen sample was not large enough for replicate analysis

**Table S2.** Results of Kruskal Wallis Test for commensal bone collagen  $\delta^{13}\text{C}$  and  $\delta^{15}\text{N}$  values across archaeological phases. Underlined values are statistically significant ( $p < 0.05$ ).

|                                          | Chi-Squared | Degree of Freedom | p-value           |
|------------------------------------------|-------------|-------------------|-------------------|
| $\delta^{13}\text{C}_{\text{Crat}}$      | 10.491      | 2                 | <u>0.005</u>      |
| $\delta^{15}\text{N}_{\text{rat}}$       | 22.253      | 2                 | <u>&lt; 0.001</u> |
| $\delta^{13}\text{C}_{\text{pig}}$       | 4.523       | 2                 | 0.104             |
| $\delta^{15}\text{N}_{\text{pig}}$       | 11.809      | 2                 | <u>0.003</u>      |
| $\delta^{13}\text{C}_{\text{commensal}}$ | 47.488      | 2                 | <u>&lt; 0.001</u> |
| $\delta^{15}\text{N}_{\text{commensal}}$ | 30.767      | 2                 | <u>&lt; 0.001</u> |

**Table S3.** Results of Pairwise Mann-Whitney-Wilcoxon Test for pig and rat collagen  $\delta^{13}\text{C}$  and  $\delta^{15}\text{N}$  values. Underlined values are statistically significant ( $p < 0.05$ ).

|                                          | Kiki-Sinapupu     | Sinapupu-Tuakamali | Kiki-Tuakamali    |
|------------------------------------------|-------------------|--------------------|-------------------|
| $\delta^{13}\text{C}_{\text{pig}}$       | 0.200             | 0.250              | 0.200             |
| $\delta^{13}\text{C}_{\text{Crat}}$      | <u>0.010</u>      | 0.158              | 0.096             |
| $\delta^{13}\text{C}_{\text{commensal}}$ | <u>&lt; 0.001</u> | 0.200              | <u>&lt; 0.001</u> |
| $\delta^{15}\text{N}_{\text{pig}}$       | 0.140             | <u>0.003</u>       | 0.669             |
| $\delta^{15}\text{N}_{\text{rat}}$       | <u>&lt; 0.001</u> | <u>0.022</u>       | <u>0.005</u>      |
| $\delta^{15}\text{N}_{\text{commensal}}$ | <u>&lt; 0.001</u> | <u>&lt; 0.001</u>  | <u>&lt; 0.001</u> |
